# Supplementary material
Source: publisher figshare collection journal article supplement (https://asha.figshare.com/articles/dataset/_/6170435)
Supplement: Supplementary file 1 [file 1]

Supplementary Table 3  
Participant Characteristics

|                                   | N after attrition | Age (years) | Education (years)             | Sex    | Dementia Severity Measure | Dementia Severity | Diagnosis (Criteria)            | Cognitive Assessments                                                                                                                                                              |
|-----------------------------------|-------------------|-------------|-------------------------------|--------|---------------------------|-------------------|---------------------------------|------------------------------------------------------------------------------------------------------------------------------------------------------------------------------------|
| Anderson et al., 2001             | 5                 | M = 86      | M = 12                        | 3M, 2F | MMSE 10-23                | mild-moderate     | probable dementia (criteria NR) | MMSE, ABCDA                                                                                                                                                                        |
| Balota et al., 2006 Experiment 1  | 103               | 18-98       |                               |        |                           |                   | DAT (NINCDS-ADRDA)              | CDR, WMS, Word Fluency Test, WAIS, Benton Copy Test - Form D, Trail Making Test, BNT, AMNART, Animal Fluency                                                                       |
|                                   | 43 DAT            | M = 75.9    | M = 14.9                      | NR     | CDR 0.5-1                 | very mild-mild    |                                 |                                                                                                                                                                                    |
|                                   | 31 age control    | M = 75.8    | M = 14.6                      | NR     |                           |                   |                                 |                                                                                                                                                                                    |
|                                   | 29 young          | M = 19.3    | undergrad                     | NR     |                           |                   |                                 |                                                                                                                                                                                    |
| Balota et al., 2006 Experiment 2  | 109               | 18-98       |                               |        |                           |                   | DAT (NINCDS-ADRDA)              | CDR, WMS, Word Fluency Test, WAIS, Benton Copy Test - Form D, Trail Making Test, BNT, AMNART, Animal Fluency                                                                       |
|                                   | 34 DAT            | M = 78.4    | M = 14.3                      | NR     | CDR 0.5-1                 | very mild-mild    |                                 |                                                                                                                                                                                    |
|                                   | 38 age control    | M = 79.2    | M = 13.4                      | NR     |                           |                   |                                 |                                                                                                                                                                                    |
|                                   | 37 young          | M = 20.7    | undergrad                     | NR     |                           |                   |                                 |                                                                                                                                                                                    |
| Bier et al., 2008                 | 30                |             |                               |        |                           |                   | DAT (NINCDS-ADRDA and DSM-IV)   | MMSE, Mattis Dementia Rating Scale, DSF/DSB, Block tapping, Letter-number sequencing, SCRT, verbal fluency, Association Match Task, Face Discrimination, Stroop, Trail Making, PDP |
|                                   | 15 early AD       | M = 73.3    | M = 10.5                      | 5M, 9F | MMSE 23.7±3.2             | minimal-mild      |                                 |                                                                                                                                                                                    |
|                                   | 15 age control    | M = 72.5    | M = 11.7                      | 5M, 9F | MMSE 29.2±0.7             |                   |                                 |                                                                                                                                                                                    |
| Cherry & Simmons-D'Gerolamo, 1999 | 6                 | M = 79      | NR                            | NR     | MMSE 17-22<br>GIDetS 4-5  | mild-to-moderate  | DAT (DSM-IV)                    | MMSE, GIDetS, GerDepS, WAIS vocabulary, FDS, BDS, Subject-performed task                                                                                                           |
| Cherry & Simmons-D'Gerolamo, 2005 | 10                | M = 81      | NR                            | NR     | MMSE 15-22<br>GIDetS 4-5  | mild-to-moderate  | probable AD (DSM-IV)            | MMSE, GIDetS, GerDepS, WAIS vocabulary, FDS, BDS, Subject-performed task                                                                                                           |
| Cherry et al., 2009               | 6                 | M = 82.5    | high school - graduate degree | NR     | MMSE 14-24                | mild-to-moderate  | DAT (DSM-IV)                    | MMSE, GerDepS, WAIS vocabulary, FDS, BDS                                                                                                                                           |

Supplementary Table 3  
Participant Characteristics (Continued)

|                                     | N after attrition              | Age (years)      | Education (years) | Sex     | Dementia Severity Measure    | Dementia Severity | Diagnosis (Criteria)                             | Cognitive Assessments                                                    |
|-------------------------------------|--------------------------------|------------------|-------------------|---------|------------------------------|-------------------|--------------------------------------------------|--------------------------------------------------------------------------|
| Haslam et al., 2011<br>Experiment 3 | 15                             | M=77±8.15        | NR                | 5M, 10F | MMSE 21.27±1.52              | mild-to-moderate  | N=7 probable AD, N=5 VD, N=3 MD (DSM-IV and ICD) | MMSE, WASI, WMS, COWAT, digit span total                                 |
| Hawley & Cherry, 2004               | 6                              | M = 84.2         | NR                | NR      | MMSE 5-20<br>GIDeS 4-5       | moderate-severe   | probable AD (DSM-IV)                             | MMSE, GIDeS, GerDepS, WAIS vocabulary, FDS, BDS, Subject-performed tasks |
| Hawley et al., 2008                 | 12                             | 76-91            | NR                | 4M, 8F  | MMSE 14-24                   | mild-to-moderate  | AD (criteria NR)                                 | MMSE, GerDepS, WAIS vocabulary, FDS, BDS, Subject-performed tasks        |
| Hopper et al., 2010                 | 27 (32 original - 5 drop outs) | M = 80.09 ± 7.49 | NR                | 7M, 25F | MMSE 17.88±5.86<br>GIDeS 3-6 | mild-severe       | N=30 AD, N=2 VD (criteria NR)                    | MMSE, GIDeS, ADAS-Cog, FLCI                                              |
| Lee et al., 2009                    | 19                             | M = 72.1 ± 8.5   | M = 9.1±4.9       | 1M, 18F | MMSE 18.9<br>CDR 0.5-1       | very mild-mild    | AD (NINCDS-ADRDA) and Dementia (DSM-IV)          | MMSE-KC, CDR, CERAD-K, LMT, BVRT-A, GerDepS-K, DGF, DGB, BNT             |
| Small, 2012                         | 5                              | M = 75.4         | M = 15.2          | 5M, 0F  | MMSE 9-25                    | mild-severe       | AD (DSM-IV-TR, Minati, NINCDS-ADRDA)             | MMSE, 3MS, BNT                                                           |

NR = not reported

#### Dementia Severity Measure

CDR = Clinical Dementia Rating Scale (Berg, 1988; Hughes et al., 1982; Morris, 1993).  
GIDeS = Global Deterioration Scale (Reisberg et al., 1982)  
MMSE = Mini-Mental State Examination (Folstein et al., 1975)  
MMSE-KC = Mini-Mental State Examination - Korean version (Lee et al., 2002)  
3MS = Modified Mini-Mental State (Teng & Chang Chui, 1987)

#### Diagnosis

AD = Alzheimer's disease; DAT = dementia of the Alzheimer's Type; VD = Vascular Dementia; MD = Mixed Dementia

#### Diagnostic Criteria

DSM-IV = Diagnostic and Statistical Manual of Mental Disorders, Fourth Edition (APA, 1994)  
DSM-IV-TR = Diagnostic and Statistical Manual of Mental Disorders, Fourth Edition, Text Revision (APA, 2000)  
ICD = International Classification of Disease (WHO, 1992)  
Minati (Minati et al., 2009)  
NINCDS-ADRDA = National Institute of Neurological and Communicative Disorders and Stroke and the Alzheimer's Disease and Related Disorders Association (McKhann et al., 1984)

---

**Cognitive Assessments**


---

ABCD = Arizona Battery of Communication Disorders of Dementia (Bayles & Tomoeda, 1991)  
 ADAS-Cog = Alzheimer's Disease Assessment Scale - Cognitive Subscale (Rosen et al., 1984)  
 AMNART = American Version of the Nelson Adult Reading Test (Grober & Sliwinski, 1991)  
 Animal Fluency Test (Goodglass & Kaplan, 1983a)  
 Association match task from the Birmingham Object Recognition Battery (BORB) (Riddoch & Humphreys, 1993)  
 Benton Copy Test - Form D (Benton, 1963).  
 Benton's Face Discrimination Test (Benton et al., 1983)  
 BNT = Boston Naming Test (Goodglass & Kaplan, 1983b)  
 BVRT-A = Benton Visual Retention Test (Sivan, 1992)  
 CERAD-K = Consortium to Establish a Registry for Alzheimer's Disease - Korean version (Lee et al., 2002)  
 COWAT = Controlled oral word association test  
 DGS/DGB = digit span forward/digit span backward, WAIS III (Wechsler, 1997a), (Wechsler, 1987)  
 FDS/BDS = forward digit span/backward digit span (WAIS, Wechsler, 1955)  
 GerDepS = Geriatric Depression Scale (Sheik & Yesavage, 1986)  
 GerDepS-K = Geriatric Depression Scale, Korean (Bae & Cho, 2004)  
 Letter number sequencing test, WAIS III (Wechsler, 1997b)  
 LMT = Logical memory tests (Wechsler, 1987)  
 Mattis Dementia Rating Scale (Mattis, 1976)  
 PDP = The Process Dissociation Procedure (Adam et al., 2005)  
 Recognition Memory Test (Warrington, 1984)  
 SCRT = Selective and Cued Reminding Test (Calisis et al., 1994)  
 Subject-performed tasks - Free and cued recall (Cherry, 1999)  
 The Stroop Test (Golden, 1978)  
 The Trail Making Test A and B (Partington & Leiter, 1949; as cited in Spreen & Strauss, 1998)  
 Trail Making Test (Armitage, 1946)  
 Verbal fluency – French version (Joanette et al., 1995)  
 Vocabulary Score, Short-Form of the WAIS Vocabulary test (Jastak & Jastak, 1965)  
 WAIS = Wechsler Adult Intelligence Scale (Wechsler, 1955)  
 WAIS vocabulary = Wechsler Adult Intelligence Scale (Wechsler, 1955)  
 WASI = Wechsler Abbreviated Scale of Intelligence (Wechsler, 1999)  
 WMS = Wechsler Memory Scale (Wechsler & Stone, 1973), Third Edition Abbreviated (Wechsler, 1997b)  
 WMS III = Wechsler Memory Scale - Third Edition Abbreviated  
 Word Fluency Test (Thurstone & Thurstone, 1949)
