# Supplementary material
Source: publisher figshare collection journal article supplement (https://asha.figshare.com/articles/dataset/_/6170435)
Supplement: Supplementary file 2 [file 1]

## Supplementary References

**References to studies excluded from this review (*After Eligibility = 11*)**

- Abrahams, J. P., & Camp, C. J. (1993). Maintenance and generalization of object naming training in anomia associated with degenerative dementia. *Clinical Gerontologist: The Journal of Aging and Mental Health*, 12(3), 57-72.
- Boudreaux, E. O., Cherry, K. E., Elliott, E. M., & Hicks, J. L. (2011). Effects of distraction and pictorial illustration on memory for countries in older adults with probable Alzheimer's disease. *Experimental Aging Research*, 37(3), 293-309.
- Brush, J. A., & Camp, C. J. (1998c). Using spaced retrieval as an intervention during speech-language therapy. *Clinical Gerontologist: The Journal of Aging and Mental Health*, 19(1), 51-64.
- Camp, C. J., & Schaller, J. R. (1989). Epilogue: Spaced-retrieval memory training in an adult day-care center. *Educational Gerontology*, 15(6), 641-648.
- Cherry, K. E., & Simmons-D'Gerolamo, S. S. (2003). Spaced-retrieval with probable Alzheimer's. *Clinical Gerontologist: The Journal of Aging and Mental Health*, 27(1-2), 139-157.
- Cherry, K. E., Simmons, S. S., & Camp, C. J. (1999). Spaced retrieval enhances memory in older adults with probable Alzheimer's disease. *Journal of Clinical Geropsychology*, 5(3), 159-175.
- Cherry, K. E., Walvoord, A. A., & Hawley, K. S. (2010). Spaced retrieval enhances memory for a name-face-occupation association in older adults with probable Alzheimer's disease. *The Journal of Genetic Psychology*, 171(2), 168-181.
- Hochhalter, A. K., Bakke, B. L., Holub, R. J., & Overmier, J. B. (2004). Adjusted spaced

- retrieval training: A demonstration and initial test of why it is effective. *Clinical Gerontologist: The Journal of Aging and Mental Health*, 27(1-2), 159-168.
- Hochhalter, A. K., Overmier, J. B., Gasper, S. M., Bakke, B. L., & Holub, R. J. (2005). A comparison of spaced retrieval to other schedules of practice for people with dementia. *Experimental Aging Research*, 31(2), 101-118.
- Joltin, A., Camp, C. J., & McMahon, C. M. (2003). Spaced-retrieval over the telephone: An intervention for persons with dementia. *Clinical Psychologist*, 7(1), 50-55.
- Vanhalle, C., Van der Linden, M., Belleville, S., & Gilbert, B. (1997). Learning new face-name associations with spaced retrieval strategy on a patient with Alzheimer-type dementia. *Brain and Cognition*, 35(3), 359-361.
- References to cognitive assessments and diagnostic tests (see footnote of Table 4)**
- Berg, L. (1988). Clinical Dementia Rating (CDR). *Psychopharmacology Bulletin*, 24, 637-639.
- Hughes, C. P., Berg, L., Danziger, W., Coben, L. A., & Martin, R. L. (1982). A new clinical scale for the staging of dementia. *British Journal of Psychiatry*, 140, 566-572.
- Morris, J. C. (1993). The Clinical Dementia Rating (CDR): Current version and scoring rules. *Neurology*, 43, 2412-2414.
- Reisberg, B., Ferris, S.H., de Leon, M. J, & Crook T. (1982). The Global Deterioration Scale for Assessment of Primary Degenerative Dementia. *American Journal of Psychiatry*, 139, 1136-1139.
- Folstein M. F., Folstein S. E., & McHugh P. R. (1975). "Mini Mental State": A practical method for grading the cognitive state of patients for the clinician. *Journal of Psychiatric Research*, 12, 189-198.
- Lee, J. H., Lee, K. U., Lee, D. Y., Kim, K. W., Jhoo, J. H., Kim, J. H... Woo, J. I. (2002).

- Development of the Korean version of the consortium to establish a registry for Alzheimer's disease assessment packet (CERAD-K): clinical and neuropsychological assessment batteries. *the journal of gerontology series b: psychological sciences*, 57(1), 47–53.
- Teng, E., & Chang Chui, H. (1987). The Modified Mini-Mental State (3MS) Examination. *Journal of Clinical Psychiatry*, 48(8), 314–318.
- American Psychiatric Association (1994). *Diagnostic and Statistical Manual of Mental Disorders* (4th ed.). Washington, DC: American Psychiatric Association.
- American Psychiatric Association (2000). *Diagnostic and statistical manual for mental disorders* (4th ed.). Washington, DC: American Psychiatric Association.
- World Health Organization. (1992). *ICD-10: The ICD-10 Classification of Mental and Behavioural Disorders: Clinical descriptions and diagnostic guidelines*. Geneva, Switzerland: USIP Press Books.
- Minati, L., Edginton, T., Bruzzone, M. G., & Giaccone, G. (2009). Current concepts in Alzheimer's disease: A multidisciplinary review. *American Journal of Alzheimers Disease and other Dementias*, 24(2), 95–121.
- McKhann, G., Drachman, D., Folstein, M., Katzman, R., Price, D., & Stadlan, E. M. (1984). Clinical diagnosis of Alzheimer's disease: Report of the NINCDS-ADRDA work group under the auspices of the Department of Health and Human Services Task Force on Alzheimer's Disease. *Neurology*, 34, 939–944.
- Bayles, K. A. & Tomoeda, C. K. (1991). *The Arizona Battery of Communication Disorders of Dementia (ABCD)*. Canyonlands Publishing, Inc.
- Rosen, W. G., Mohs, R. C., & Davis, K. L. (1984). A new rating scale for Alzheimer's disease.

- American Journal of Psychiatry*, 141, 1356–1364.
- Grober, E., & Sliwinski, M. (1991). Development and validation of a model for estimating premorbid verbal intelligence in the elderly. *Journal of Clinical and Experimental Neuropsychology*, 13, 933–949.
- Goodglass, H. & Kaplan, E. (1983a). *Boston Diagnostic Aphasia Examination* (3rd ed.). Philadelphia: Lea & Febiger.
- Goodglass, H., & Kaplan, E. (1983b). *Boston Naming Test*. Philadelphia, PA: Lea & Febiger.
- Riddoch, M. J., & Humphreys, G. W. (1993). *Birmingham Object Recognition Battery (BORB)*. Hove, UK: Lawrence Erlbaum Associates Ltd.
- Benton, A. L. (1963). *The revised Visual Retention Test: Clinical and experimental applications*. San Antonio, TX: Psychological Corporation.
- Benton, A. L., Hamsher, K., Varney, N. R., & Spreen, O. (1983). *Contributions to neuropsychological assessment*. Oxford: Oxford University Press.
- Sivan, A. B. (1992). *Benton Visual Retention Test*, Fifth ed. Psychological Corporation, San Antonio, TX.
- Wechsler, D. (1955). *Wechsler Adult Intelligence Scale (manual)*. San Antonio, TX: Psychological Corporation.
- Wechsler, D. (1955). *Wechsler Adult Intelligence Scale* (7th ed.). New York: Psychological Corporation.
- Wechsler, D. (1987). *Wechsler Memory Scale-Revised*. Psychological Corporation, New York.
- Wechsler, D. (1997a). *Wechsler Adult Intelligence Scale–III (WAIS–III)*. New York: Psychological Corporation.
- Wechsler, D. (1997b). *Wechsler Memory Scale – 3rd Edition (III)*. New York: Psychological

Corporation.

Wechsler, D. (1999). Wechsler Abbreviated Scale of Intelligence (WASI). San Antonio, TX:

The Psychological Corporation.

Wechsler, D., & Stone, C.P. (1973). Wechsler Memory Scale (manual). San Antonio, TX:

Psychological Corporation.

Sheikh, J. I., & Yesavage, J. A. (1986). Geriatric depression scale (GDS): Recent evidence and development of a shorter version. In T. L. Brink (Ed.), *Clinical Gerontology* (pp. 165-173). NY: The Haworth Press, Inc.

Bae, J. N., Cho, M. J. (2004). Development of the Korean version of the Geriatric Depression Scale and its short form among elderly psychiatric patients. *Journal of Psychosomatic Research* 57(3), 297–305.

Mattis, S. (1976). Mental status examination for organic mental syndrome in the elderly patient.

In L. Bellak, & T. B. Karasu (Eds.), *Geriatric Psychiatry* (pp. 77–121). New York: Grune and Stratton.

Adam, S., Van der Linden, M., Collette, F., Lemauvais, L., & Salmon, E. (2005). Further exploration of controlled and automatic memory processes in early Alzheimer's disease. *Neuropsychology*, 19, 420–427.

Warrington, E. (1984). *Recognition Memory Test*. Windsor, UK: NFER-Nelson.

Calisis, F., Wyns, C., Van der Linden, M., & Coyette, F. (1994). Procédure de rappel libre/indiqué de Grober et Buschke: Manuel d'utilisation et normes préliminaires [The Grober and Buschke free/cued recall procedure: Utilization manual and preliminary norms].

Université de Liège, Belgium: Faculté de psychologie et des sciences de l'éducation.

Golden, J. C. (1978). *Stroop Color and Word Test*. Chicago, IL: Stoelting Co.

Armitage, S. G. (1946). An analysis of certain psychological tests used in evaluation of brain injury. *Psychological Monographs*, 60(1, Whole No. 277), 1–48.

Joanette, Y., Ska, B., Poissant, A., Belleville, S., Lecours, A. R., & Peretz, I. (1995). Protocole d'évaluation optimale neuropsychologique (PENO) [Protocol of Optimal Neuropsychological Evaluation (PONE)]. Centre de recherche en santé et vieillissement, Institut universitaire de gériatrie de Montréal, Canada: Université de Montréal.

Jastak, J., & Jastak, S. (1965). Short forms of the WAIS vocabulary subtest. *Journal of Clinical Psychology*, 20, 167-199.

Thurstone, L. L., & Thurstone, L. G. (1949). *Examiner manual for the SRA Primary Mental Abilities Test*. Chicago: Science Research Associates.

Supplementary Figure 1  
Decision Tree

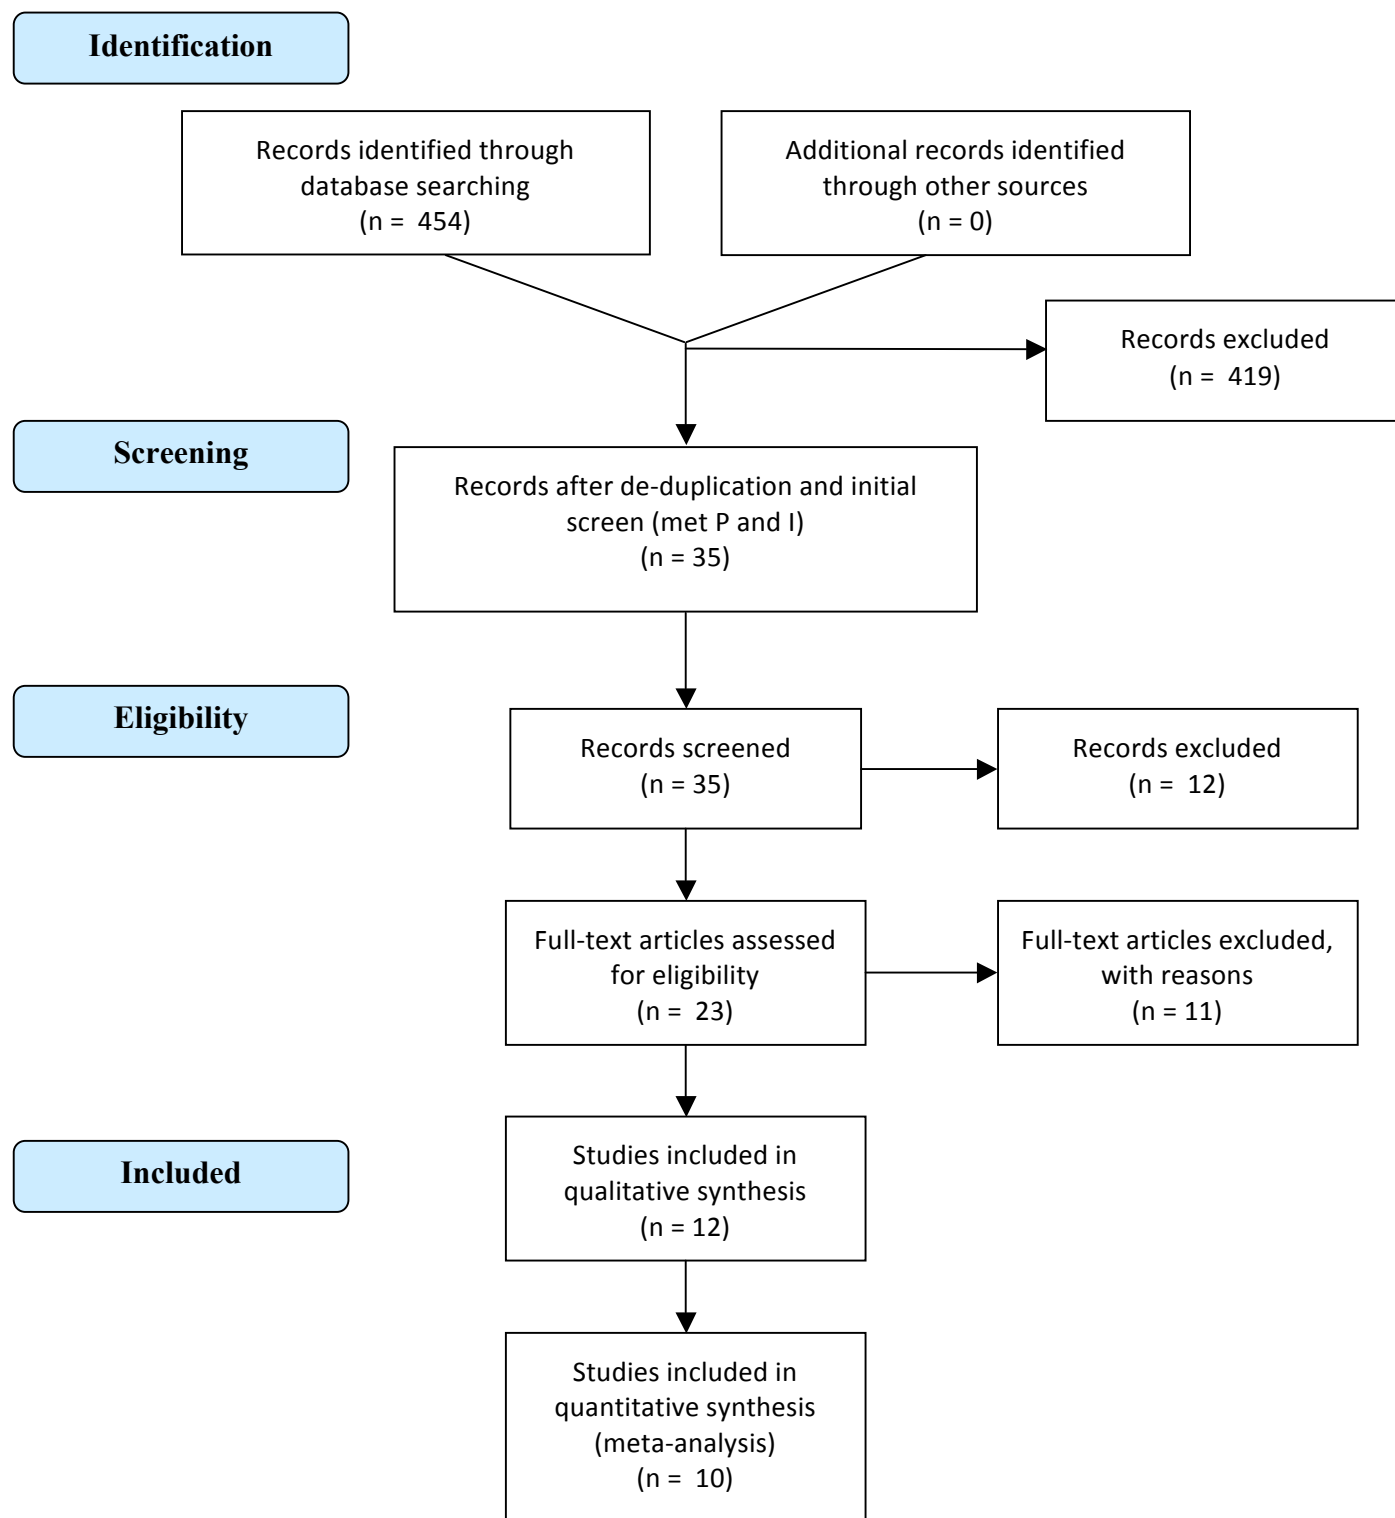

Adapted from: Moher D, Liberati A, Tetzlaff J, Altman DG, The PRISMA Group (2009).

Supplementary Table 1  
*Appraisal Point System*

| <b>Criteria</b>                      | <b>Yes = 1 or 2</b>                                                                                                                                                                                                                                                                                             | <b>No or NR<br/>(Not Reported) = 0</b>                                                                                                          |
|--------------------------------------|-----------------------------------------------------------------------------------------------------------------------------------------------------------------------------------------------------------------------------------------------------------------------------------------------------------------|-------------------------------------------------------------------------------------------------------------------------------------------------|
| <b>1. Rationale (1)</b>              | Focused and complete PICO,<br>Unbiased review of the literature                                                                                                                                                                                                                                                 | One or more part of PICO is missing, review of literature is biased                                                                             |
| <b>2. Comparison/Control (2)</b>     | Appropriate comparison, including between-subject designs and within-subject design, counterbalancing stimuli, or pre- and post- testing                                                                                                                                                                        | Insufficient Comparison: Case Studies or Case Series that are descriptive in nature, or questionable comparison group                           |
| <b>3. Random Assignment (2)</b>      | Participants randomly assigned to treatment conditions                                                                                                                                                                                                                                                          | No Random Assignment                                                                                                                            |
| <b>4. Participants (1)</b>           | All three criteria adequately described:<br>1. Diagnosis: Progressive degenerative dementia with (declarative) memory as the primary impairment, including mixed dementia, Dementia of the Alzheimer's Type, and Vascular Dementia<br>2. Severity<br>3. Demographics described: i.e. age and/or education level | Does not describe one of the criteria, or includes other populations (e.g., Pick's disease, HIV/AIDS, Parkinson's disease, Huntington's Chorea) |
| <b>5. Measures and Materials (2)</b> | Rationale described for selection of outcome measures, Clearly define how “goal mastery” will be measured                                                                                                                                                                                                       | No or poor explanation of how outcome is measured, outcome measure invalid                                                                      |
| <b>6. Procedures (2)</b>             | Study procedures are well articulated and implemented as described (preferable to describe some measure of adherence/fidelity to protocol)                                                                                                                                                                      | Study procedures deviate from protocol or authors do not report on adherence                                                                    |



|                                         |                                                                                                                                                                                                                                                                                                                                                                      |                                                                                    |
|-----------------------------------------|----------------------------------------------------------------------------------------------------------------------------------------------------------------------------------------------------------------------------------------------------------------------------------------------------------------------------------------------------------------------|------------------------------------------------------------------------------------|
| <b>7. Statistical Reporting (2)</b>     | <p>Internal Validity (minimum 2):</p> <ol style="list-style-type: none"> <li>1. Appropriate use of statistical procedures or analyses for sample size, distribution and design (parametric or non-parametric);</li> <li>2. Provides descriptive statistics (means and SD);</li> <li>3. Effect size reported (e.g., d values, odds ratios, or eta squared)</li> </ol> | Does not meet 2 of the internal validity inclusion criteria                        |
| <b>8. Clinical Significance (1)</b>     | <p>External Validity (minimum 2):</p> <ol style="list-style-type: none"> <li>1. report generalization (of procedure or stimuli)</li> <li>2. maintenance post-treatment</li> <li>3. study carried out in real-world settings</li> <li>4. use of functional stimuli</li> </ol>                                                                                         | Does not meet 2 of the external validity inclusion criteria                        |
| <b>9. Discussion/Interpretation (1)</b> | <p>Linked to PICO, Appropriate conclusions in relation to study design and results, unexpected findings addressed and alternative explanations offered, study limitations acknowledged</p>                                                                                                                                                                           | Does not link to PICO, draws inappropriate conclusions based on design and results |

## Supplementary Table 2

*Levels of Evidence*

| Level                                                                                                                                             | Description                                                                                 |
|---------------------------------------------------------------------------------------------------------------------------------------------------|---------------------------------------------------------------------------------------------|
| Ia                                                                                                                                                | Well designed meta-analysis of > 1 randomized controlled trial                              |
| Ib                                                                                                                                                | Well designed randomized controlled trial                                                   |
| IIa                                                                                                                                               | Well designed controlled trial without randomization                                        |
| IIb                                                                                                                                               | Well designed quasi-experimental studies                                                    |
| III                                                                                                                                               | Well designed non-experimental studies i.e. correlations and case studies                   |
| IV                                                                                                                                                | Expert committee report, consensus conference, clinical experience of respected authorities |
| Levels of evidence for studies of treatment efficacy, ranked according to quality and credibility from most credible (Ia) to least credible (IV). |                                                                                             |

*Adapted from the [Scottish Intercollegiate Guidelines Network www.sign.ac.uk](http://www.sign.ac.uk).*
